# Supplementary material
Source: publisher site journal article supplement (https://www.dovepress.com/article/supplementary_file/591381/Supplementary%20Table1.xlsx)
Supplement: Supplementary file 1 [file Supplementary%20Table1.xlsx]

## Sheet: Sheet3
Flavonoids	Terpenoids	Volatile oils	Phenylethyl	Sterols	Alkaloids	Organic acids
Wogonoside	β-Carotene	Benzyl alcohol	Verbascoside	β-Sitosterol	Piperlonguminine	Vanillin
Wogonin 5-O-β-D-glucoside	Lutein		Martynoside	Stigmasterol	Pellitorine	Syringaldehyde
Wogonin	7-O-Acetylloganic acid		Leucosceptoside A	Daucosterin	N1,N5,N10-Tri-p-(E,E,E)-coumaroylspermidine	Sinapoyl hexoside
Viscidulin III-2'-O-β-D-glucopyranoside	(+)-Crotepoxide		Isomartynoside		Futoamide	Phenyl acetic acid
Viscidulin III 6'-O-β-D-glucoside			Darendoside B		Dihydropiperlonguminine	Ferulic acid methyl ester
Viscidulin III			Darendoside A			Benzoic acid
Viscidulin II			Cistanoside D			4-O-β-D-glucosyl-trans-p-coumaric acid
Viscidulin I			Acteoside			4-O-β-D-glucosyl-cis-p-coumaric acid
Tenaxin II						4'-(β-D-glucopyranosyloxy)-3,3-dimethoxy-9,9'-epoxylignane-4,7'-diol
Tenaxin I						4'-(β-D-glucopyranosyloxy)-3,3',5'-trimethoxy-9,9'-epoxylignane-4, 7'-diol
Skullcapflavone II						4'-(β-D-glucopyranosyloxy)-3,3',5,5'-tetramethoxy-9,9'-epoxylignane-4, 7'-diol
Skullcapflavone I						(E)-4-[(2-methylpropyl) amino]-4-oxo-2-butenoic acid
Scutevulin						(+)-Syringaresinol-O-β-D-glucoside
Scutellarin
Scutellarein
Scutebaicalin
Salvigenin
Salidroside
Rivularin
Quercetin 3-glucuronide
Pinocembrin 7-O-glucoronide
Pinocembrin
Patuletin 7-O-β-D-glucuronide
Oroxyloside
Oroxylin A 7-O-β-D-glucoside
Oroxylin A
Norwogonin 7-O-β-D-glucuronide
Norwogonin
Naringenin 7-O-glucoronide
Naringenin
Methoxybaicalein
Luteolin 7-O-glucuronide
Luteolin
lsoscutellarein
lsocarthamidin
Kaempferol 3-O-β-D-glucoside
Isoscutellarein 8-O-β-D-glucuronide
Isocarthamidin-7-O-β-D-glucuronide
Isocarthamidin
Genkwanin
Dihydrooroxylin A
Dihydrobaicalin
Delphinidin 3-O-(6-O-malonyl)-β-d-glucoside-5-O-β-D-glucoside
Chrysin 8-C-β-D-glucoside
Chrysin 7-O-β-d-glucuronide
Chrysin 6-C-β-l-arabinopyranoside-8-C-β-D-glucoside
Chrysin 6-C-β-D-glucoside-8-C-β-l-arabinopyranoside
Chrysin 6-C-β-d-glucoside-8-C-β-arabinofuranoside
Chrysin 6-C-β-d-glucoside
Chrysin 6-C-β-arabinofuranoside-8-C-β-D-glucoside
Chrysin 6-C-α-l-arabinopyranoside-8-C-β-D-glucoside
Chrysin 3-C-α-arabinopyranoside-8-C-β-D-glucoside
Chrysin
Carthamidin 7-O-β-D-glucuronide
Carthamidin
Baicalin
Baicalein 7-O-β-D-glucoside
Baicalein 6-O-glucuronide
Baicalein
Apigenin 7-O-β-D-glucuronide
Apigenin 7-O-β-D-glucoside
Apigenin 7,4'-di-O-rhamnoside
Apigenin 6-C-α-l-arabinopyranoside-8-C-β-D-glucoside
Apigenin 6-C-glucosyl-8-C-arabinoside
Apigenin
8-Methoxy-5-O-glucosideflavone
8,8''-Bibaicalein
7-O-Methylwogonin
7-Methoxychrysin
6-Hydroxyluteolin 7-O-glucoronide
6-Hydroxyluteolin
6'-Hydroxy-5,6,7,8,2'-pentamethoxyflavone
6,6'-Dihydroxy-5,7,8,2'-tetramethoxyflavone
5-Hydroxy-7,8,6'-trimethoxyflavone 2'-O-β-D-glucuronide
5,8-Dihydroxy-7-methoxyflavone
5,8-Dihydroxy-6,7-dimethoxyflavone
5,8,2'-Trihydroxy-7-methoxyflavone
5,8,2'-Trihydroxy-6,7-dimethoxyflavone
5,7-Dihydroxy-8,2',3',6'-tetramethoxyflavone
5,7-Dihydroxy-6,8-dimethoxyflavone
5,7-Dihydroxy-6,8,2',3'-tertramethoxyflavone
5,7,6'-Trihydroxyflavone 2'-O-β-D-glucoside
5,7,6'-Trihydroxy-8,2'-dimethoxyflavone
5,7,6'-Trihydroxy-2'-methoxyflavonol
5,7,6'-Trihydroxy-2'-methoxyflavone
5,7,4'-Trihydroxy-6-methoxyflavone
5,7,4'-Trihydroxy-8-methoxyflavone
5,7,3',4',5'-Pentamethoxyflavone
5,7,2'-Trihydroxy-6,8-dimethoxyflavone
5,7,2'-Trihydroxy-6'-methoxyflavone
5,7,2',6'-Tetrahydroxyflavone
5,7,2',5'-Tetrahydroxyflavone
5,7,2',3'-Tetrahydroxyflavone
5,6-Dihydroxy-7-methoxyflavone
5,6'-Dihydroxy-7,8-dimethoxyflavone 2'-O-β-D-glucoside
5,6'-Dihydroxy-6,7-dimethoxyflavone 2'-O-β-D-glucoside
5,6'-Dihydroxy-6,7,8-trimethoxyflavone 2'-O-β-D-glucoside
5,6,8-Trimethoxy-3',4'-methylenedioxyflavone 7-O-β-D-glucoside
5,6,7-Trihydroxy-4'-methoxyflavone
5,4'-Dihydroxy-6,7,3',5'-tetramethoxyflavone
5,2'-Dihydroxy-6-methoxyflavone 7-O-β-D-glucuronide
5,2'-Dihydroxy-6,7,8,3'-tetramethoxyflavone
5,2',5'-Trihydroxy-6,7,8-trimethoxyflavone
4'-Hydroxywogonin
4',5,7-Trihydroxy-6-methoxyflavanone
3,5,8-Trimethoxy-3',4'-methylenedioxyflavone 7-O-β-D-glucoside
3,5,7,6'-Tetrahydroxyflavone 2'-O-β-D-glucoside
3,5,4'-Trihydroxy-6,7,8-trimethoxyflavone
2'-Hydroxychrysin
2',6',5,7-Tetrahydroxyflavanone
2,6,2',4'-Tetrahydroxy-6'-methoxychalcone
(2S)-7-Hydroxy-5-methoxyflavanone
(2S)-7,2',6'-Trihydroxy-5-methoxyflavanone
(2S)-5-Hydroxy-6-methoxyflavanone 7-O-β-D-glucuronide
(2S)-5-Hydroxy-6-methoxyflavanone 7-O-β-D-glucoside
(2S)-5,8,3',4'-Tetrahydroxyflavanone 7-O-β-D-glucuronide
(2S)-5,7-Dihydroxy-6-methoxyflavanone-7-O-β-D-glucopyranoside
(2S)-5,7,6'-Trihydroxyflavanone 2'-O-β-D-glucoside
(2S)-5,7,4'-Trihydroxy-6-methoxyflavanone
(2S)-5,7,2',6'-Tetrahydroxyflavanone
(2S)-5,7,2',5'-Tetrahydroxyflavanone
(2S)-5,6,3',4'-Tetrahydroxyflavanone 7-O-β-D-glucuronide
(2S)-5,4'-Dihydroxy-7-methoxyflavanone
(2S) -5,7,2',5'-Tetrahydroxyflavanone-7-O-β-D-glucopyranoside
(2R,3R)-Pinobankasin 6-C-glucoside-8-C-arabinopyranoside
(2R,3R)-3,5,7,2',6'-Pentahydroxyflavanone
(+)-Eriodictyol
